# Supplementary material for: The zebrafish embryo as a tool for screening and characterizing pleurocidin host-defense peptides as anti-cancer agents
Source: PubMed Central journal article supplement — Dis Model Mech. 2011 Jul 4;4(5):622–33. doi: 10.1242/dmm.007310 (PMC3177944; doi:10.1242/dmm.007310), 2011-07-04
Supplement: supp_007310_DMM007310TableS1.pdf [file supp_007310_DMM007310TableS1.pdf]

Table 1Supplementary. Toxicity of pleurocidin variants against zebrafish embryos. Acute toxicity was assessed at 1h after exposure and chronic toxicity at 24 h after exposure to 1, 5 and 25  $\mu$ M peptide. Concentrations causing death and/or teratogenic or cardiac effects to at least 10% of embryos are listed.

| Peptide | ACUTE TOXICITY (1 h post-exposure) |                         |                         | CHRONIC TOXICITY (24 h post-exposure) |                          |                         |
|---------|------------------------------------|-------------------------|-------------------------|---------------------------------------|--------------------------|-------------------------|
|         | 4hpf embryo                        | 28hpf embryo            | 52hpf embryo            | 4hpf embryo                           | 28hpf embryo             | 52hpf embryo            |
| 1       | 25 $\mu$ M <sup>c</sup>            | 25 $\mu$ M <sup>c</sup> | 5 $\mu$ M               | 5 $\mu$ M                             | 25 $\mu$ M <sup>c</sup>  | 5 $\mu$ M               |
| 2       | no killing                         | no killing              | no killing              | 25 $\mu$ M <sup>a</sup>               | no killing               | no killing              |
| 3       | 5 $\mu$ M <sup>c</sup>             | 25 $\mu$ M <sup>c</sup> | 25 $\mu$ M <sup>c</sup> | 5 $\mu$ M                             | 5 $\mu$ M <sup>c</sup>   | 25 $\mu$ M <sup>c</sup> |
| 3D      | no killing                         | no killing              | no killing              | no killing                            | no killing               | no killing              |
| 4       | 5 $\mu$ M                          | 5 $\mu$ M <sup>a</sup>  | 5 $\mu$ M <sup>c</sup>  | 1 $\mu$ M                             | 5 $\mu$ M <sup>b,c</sup> | 1 $\mu$ M <sup>a</sup>  |
| 5       | 5 $\mu$ M                          | 25 $\mu$ M <sup>c</sup> | 5 $\mu$ M               | 1 $\mu$ M                             | 25 $\mu$ M <sup>c</sup>  | 5 $\mu$ M               |
| 6       | 25 $\mu$ M <sup>c</sup>            | 25 $\mu$ M <sup>c</sup> | 5 $\mu$ M               | 5 $\mu$ M                             | 25 $\mu$ M <sup>c</sup>  | 1 $\mu$ M <sup>a</sup>  |
| 7       | 5 $\mu$ M                          | 5 $\mu$ M               | 5 $\mu$ M <sup>c</sup>  | 5 $\mu$ M <sup>a</sup>                | 5 $\mu$ M <sup>c</sup>   | 5 $\mu$ M <sup>c</sup>  |
| 8       | no killing                         | no killing              | no killing              | no killing                            | 25 $\mu$ M <sup>a</sup>  | no killing              |
| 9       | no killing                         | no killing              | no killing              | 25 $\mu$ M <sup>a</sup>               | 25 $\mu$ M               | no killing              |
| 10      | 25 $\mu$ M                         | 25 $\mu$ M              | 25 $\mu$ M              | 5 $\mu$ M <sup>a</sup>                | 25 $\mu$ M <sup>a</sup>  | 25 $\mu$ M              |
| 11      | 5 $\mu$ M                          | 5 $\mu$ M               | 5 $\mu$ M               | 5 $\mu$ M <sup>c</sup>                | 5 $\mu$ M <sup>a</sup>   | 5 $\mu$ M <sup>c</sup>  |
| 12      | 5 $\mu$ M                          | 25 $\mu$ M              | 5 $\mu$ M <sup>c</sup>  | 5 $\mu$ M <sup>a</sup>                | 25 $\mu$ M <sup>c</sup>  | 5 $\mu$ M <sup>c</sup>  |
| 13      | 25 $\mu$ M <sup>c</sup>            | 25 $\mu$ M              | 25 $\mu$ M              | 5 $\mu$ M <sup>a</sup>                | 25 $\mu$ M <sup>c</sup>  | 1 $\mu$ M               |
| 14      | 25 $\mu$ M <sup>c</sup>            | 5 $\mu$ M               | 5 $\mu$ M               | 5 $\mu$ M <sup>c</sup>                | 5 $\mu$ M <sup>c</sup>   | 5 $\mu$ M               |
| 15      | 1 $\mu$ M                          | 5 $\mu$ M               | 5 $\mu$ M               | 1 $\mu$ M <sup>a</sup>                | 1 $\mu$ M                | 5 $\mu$ M               |
| 16      | 25 $\mu$ M                         | 25 $\mu$ M              | 5 $\mu$ M               | 5 $\mu$ M <sup>a</sup>                | 25 $\mu$ M <sup>c</sup>  | 5 $\mu$ M               |
| 17      | 5 $\mu$ M                          | 5 $\mu$ M               | 5 $\mu$ M <sup>c</sup>  | 5 $\mu$ M <sup>a</sup>                | 5 $\mu$ M <sup>a</sup>   | 5 $\mu$ M <sup>c</sup>  |
| 18      | no killing                         | no killing              | no killing              | 25 $\mu$ M <sup>c</sup>               | no killing               | no killing              |
| 19      | 5 $\mu$ M                          | 5 $\mu$ M               | 5 $\mu$ M               | 5 $\mu$ M <sup>c</sup>                | 5 $\mu$ M <sup>a,c</sup> | 5 $\mu$ M               |
| 20      | 25 $\mu$ M                         | 25 $\mu$ M              | 25 $\mu$ M              | 5 $\mu$ M                             | 25 $\mu$ M <sup>c</sup>  | 25 $\mu$ M              |
| 123     | 5 $\mu$ M                          | 5 $\mu$ M               | 5 $\mu$ M               | 5 $\mu$ M <sup>c</sup>                | 5 $\mu$ M <sup>a</sup>   | 5 $\mu$ M <sup>c</sup>  |
| 124     | 5 $\mu$ M                          | 25 $\mu$ M              | 5 $\mu$ M               | 5 $\mu$ M <sup>a</sup>                | 25 $\mu$ M <sup>c</sup>  | 5 $\mu$ M               |
| 125     | 5 $\mu$ M <sup>c</sup>             | 5 $\mu$ M               | 5 $\mu$ M               | 5 $\mu$ M <sup>c</sup>                | 5 $\mu$ M <sup>c</sup>   | 5 $\mu$ M <sup>c</sup>  |
| 126     | 5 $\mu$ M                          | no killing              | 5 $\mu$ M               | 5 $\mu$ M <sup>a</sup>                | 25 $\mu$ M <sup>c</sup>  | 5 $\mu$ M               |
| 127     | 5 $\mu$ M                          | 5 $\mu$ M               | 25 $\mu$ M              | 5 $\mu$ M <sup>a</sup>                | 5 $\mu$ M <sup>a</sup>   | 25 $\mu$ M <sup>c</sup> |
| 128     | 25 $\mu$ M                         | 5 $\mu$ M               | 5 $\mu$ M               | 5 $\mu$ M <sup>a</sup>                | 5 $\mu$ M                | 5 $\mu$ M               |

<sup>a</sup> teratogenic effects

<sup>b</sup> cardiac effects

<sup>c</sup> all 30 treated embryos were dead
